# Supplementary material
Source: Springer Nature journal article supplement (https://www.springermedizin.de/resource/supplementary/12875_2005_139_MOESM5_ESM.pdf/9436514)

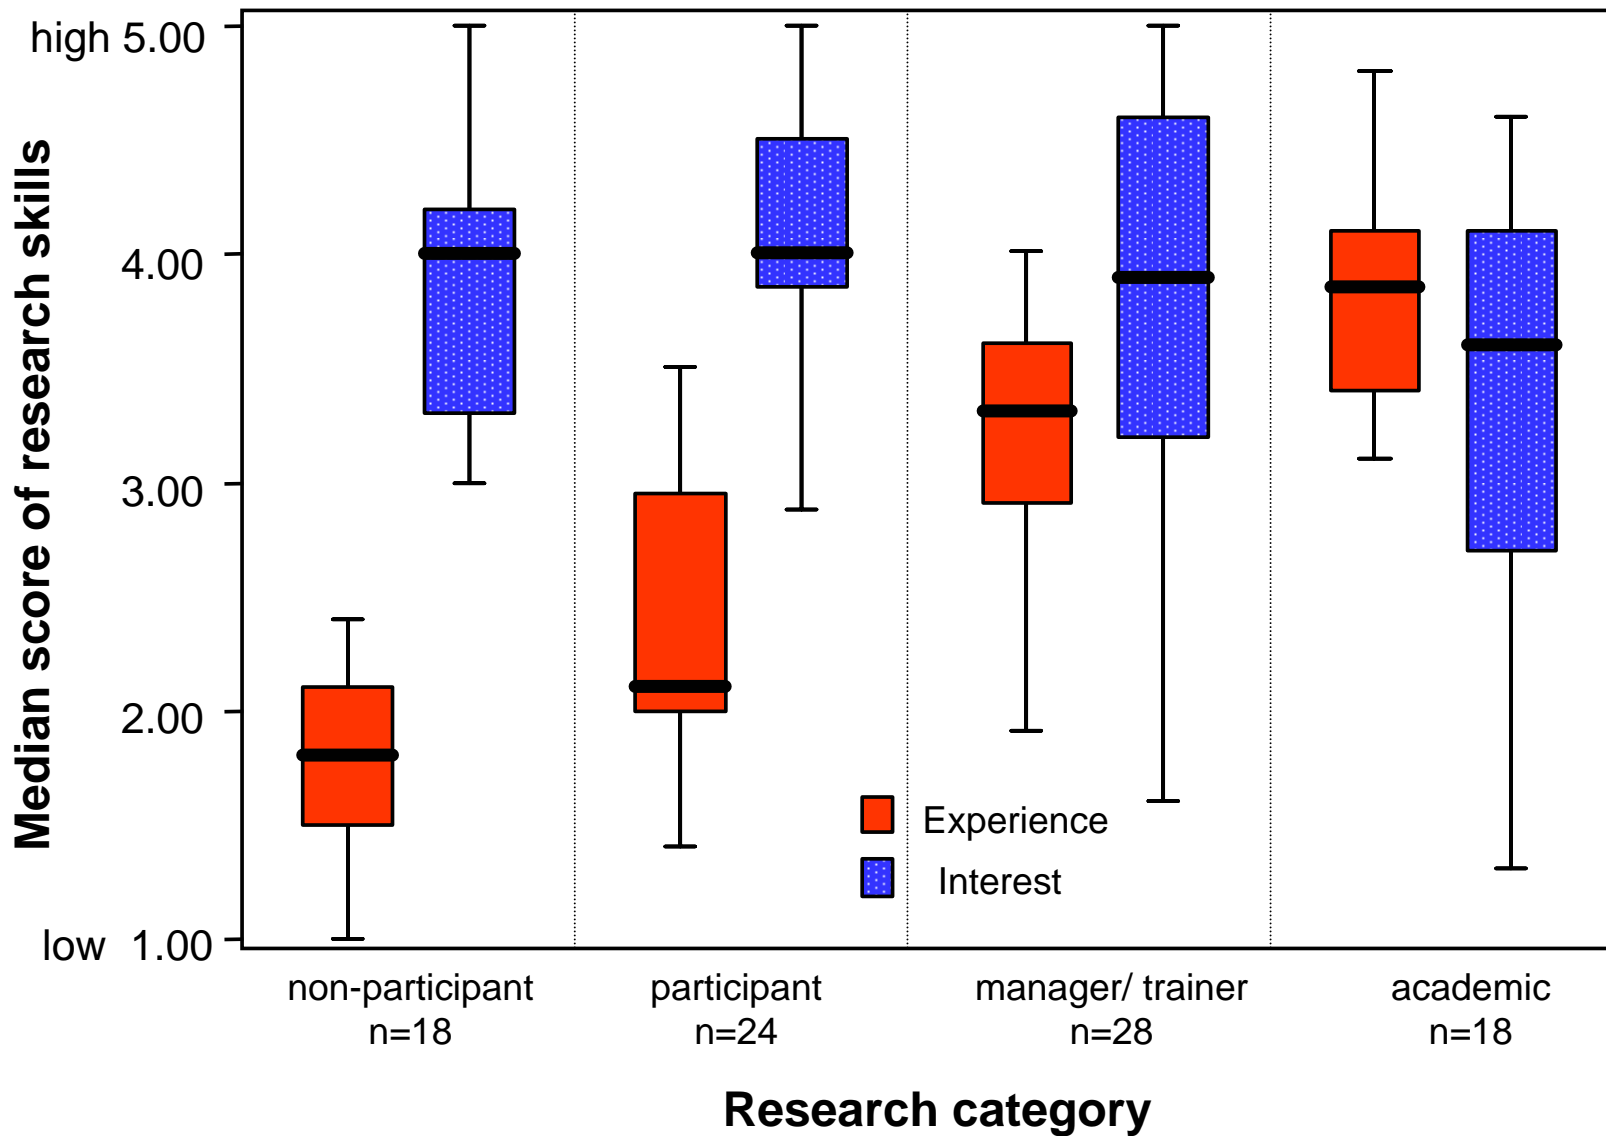

Supplement: MOESM5 [file 9436514]
